# Supplementary material
Source: PubMed Central journal article supplement (PMC2851618)
Supplement: NIHMS185272-supplement-Supplementary_data.pdf [file NIHMS185272-supplement-Supplementary_data.pdf]

## Supplementary Appendix

This appendix has been provided by the authors to give readers additional information about their work.

Supplement to: Picard C, McCarl C-A, Papolos A, et al. *STIM1* mutation associated with a syndrome of immunodeficiency and autoimmunity. N Engl J Med 2009;360:1971-80.

## Supplementary Materials

### Supplementary Figure Legends

**Supplementary Figure 1. Reduced numbers of regulatory T cells in P1.** Flow cytometric analysis was performed on permeabilized, age-matched PBMCs from a healthy control (CTRL) and P1 using antibodies to CD3 (APC-conjugated), CD4 (FITC-conjugated) and Foxp3 (PE-conjugated). Percentages of CD4<sup>+</sup> Foxp3<sup>+</sup> positive cells were calculated after gating on CD3<sup>+</sup> T cells (age-appropriate normal range of CD4<sup>+</sup> Foxp3<sup>+</sup> cells in peripheral blood 2.5% - 6%).

**Supplementary Figure 2. P1 is homozygous for two single nucleotide polymorphisms in the 5'UTR of *STIM2*.** **a, Sequencing of genomic DNA from P1 and P3** revealed two homozygous variations in exon 1 of *STIM2* (C→T and C→G) in P1 at nucleotide positions 391 and 419, respectively of the corresponding mRNA sequence (NM\_020860). Both nucleotides are located in the 5'UTR of *STIM2* upstream of an unconventional UUG translation start site (nt 478-480)<sup>16</sup>. **b,** Four healthy siblings (V-2, V-3, V-5, V-6) and her parents (IV-1, IV-2) are heterozygous for both variations in the 5'UTR of *STIM2*, whereas P3 (V,7) carries two wild-type alleles like a healthy sister (V-8). **c,** Genomic DNA from 48 individuals of caucasian background unrelated to the kindred were sequenced to assess whether the two variations in the 5'UTR of *STIM2* are common polymorphisms. Fifteen individuals were found to be heterozygous for both variations and 33 individuals had wild-type alleles. None of the controls was homozygous for both variations. Taken together, the two variations are very unlikely to contribute to the disease phenotype and defect in SOCE because (i) both variations occur in the 5'UTR of *STIM2* and not in the coding sequence, (ii) both variations in *STIM2* are common genetic polymorphisms observed in ~ 31% of unrelated controls, (iii) P3 who suffered from the same disease as P1 is wild-type for both variations.

**Supplementary Figure 3. *STIM1* protein expression is undetectable in P1 fibroblasts.**

For Western blot analysis, total cell lysates of fibroblasts from P1, a healthy control (CTRL) and a previously described ORAI1-deficient patient (ORAI1, R91W)<sup>8</sup> were separated by SDS-PAGE, transferred to nitrocellulose membrane and incubated with an affinity purified antibody directed against the C-terminus (CT) of STIM1 (**a**) and a monoclonal antibody directed against the N-terminus (NT, a.a. 25-139) of human STIM1 (**b**). Anti-actin antibody was used to control for protein loading. To control for the specificity of STIM1 detection using anti-STIM1 antibodies, T cells from control mice

(Stim1<sup>fl/fl</sup>) and mice lacking STIM1 expression (Stim1<sup>fl/fl</sup> CMV-Cre) were included in the experiment<sup>22</sup>. No full-length or truncated STIM1 protein was detectable in fibroblasts from P1 (STIM1-E136X) or in T cells from *Stim1*-deficient mice. Only a weak STIM1 band was detected for the ORAI1-deficient patient (lane 3) because of reduced total protein loaded in lane 3. STIM1 expression was quantified and normalized to Actin expression using ImageJ software (*Right panel* in **b**). Asterisks (\*) in **a** denote unspecific bands obtained by incubation with anti-STIM1 antibody.

**Supplementary Table 1. Primers used for PCR amplification of genomic DNA and sequencing of human *STIM1* and *STIM2* genes.** Reference gene assembly (and gene ID) numbers: STIM1: NT\_009237 (6786), STIM2: NT\_006316 (57620).

## Supplementary Methods

**Real-time PCR.** Total RNA was isolated from fibroblasts using Trizol reagent (Invitrogen, Carlsbad, CA). cDNA was synthesized from 2-5 mg total RNA using Superscript II cDNA synthesis kit (Invitrogen). Quantitative real-time PCR was performed using an iCycler system (BioRad, Hercules, CA) and SYBR Green dye (Applied Biosystems, Foster City, CA). PCR efficiency was tested by serial dilutions and specificity of amplification was verified by melt curve analysis and agarose gel electrophoresis of PCR products. SYBR green signals were captured at the end of each polymerization step (72 °C). A threshold was set in the linear part of the amplification curve. Threshold cycles ( $C_T$ ) for genes of interest were normalized to the  $C_T$  for GAPDH house keeping gene control obtaining  $\Delta C_T$ . Expression data were plotted as  $0.5^{\Delta C_T} * 10^6$ , where  $1 \times 10^6$  arbitrary units equal GAPDH cDNA expression levels. The following primers were used for amplification of STIM1, STIM2 and GAPDH (Integrated DNA Technologies): STIM1 Ex9 5' AGAAACACACTCTTTGGCACC, STIM1 Ex10 3' AATGCTGCTGTCACCTCG; STIM2 Ex10 5' AGTCTCCATTCCACCCTATCC, STIM2 Ex10 3' CCAGGAGGTTTAGCCATGG; GAPDH Ex8 5' TCTCCTCTGACTTCAACAGC, GAPDH Ex9 3' CTGTTGCTGTAGCCAAATTCG. Primers were designed to straddle an intervening intronic sequence to prevent amplification of genomic DNA.

**Cell extracts and immunoblotting.** Immunoblotting was done as described using standard protocols<sup>14</sup>. For immunoblotting, protein was extracted from fibroblasts using a lysis buffer containing 250 mM NaCl, 20 mM TrisHCl (pH 7.5), 10 mM MgCl<sub>2</sub>, 1% nonidet-P40, 0.5% sodium deoxycholate, 0.1% SDS (all from Sigma) and protease inhibitors PMSF (1 mM), aprotinin (25ng/ml), leupeptin (25 ng/ml, all from Sigma). Proteins were separated by 8-14% SDS-PAGE and electrotransferred onto nitrocellulose membranes. Antibody incubations were performed in 1x TBS (10 mM Tris-HCl pH 8.0, 150 mM NaCl) plus 5% non-fat dry milk, blots were washed with TBS containing 0.05% Tween-20 and bands detected with Western Lightning Chemiluminescence Reagent

Plus (PE Life Sciences, Boston, MA) and HyBlot CL autoradiography film (Denville Scientific). To assess equal loading, blots were reprobed with anti-actin antibody.

**Single-cell calcium imaging.** Measurements of intracellular  $\text{Ca}^{2+}$  concentrations were done as described<sup>8</sup>. Briefly, fibroblasts were grown directly on UV-sterilized coverslips and loaded with 3  $\mu\text{M}$  fura-2/AM. Cells were analyzed by time-lapse videoimaging on a IX81 epifluorescence microscope (Olympus) using Slidebook imaging software v4.2 (Olympus). The standard extracellular Ringer's solution contained (in mM): 155 NaCl, 4.5 KCl, 2  $\text{CaCl}_2$ , 1  $\text{MgCl}_2$ , 10 D-glucose, and 5 Na-Hepes (pH 7.4).  $\text{Ca}^{2+}$ -free Ringer's was prepared by substituting 2 mM  $\text{MgCl}_2$  for  $\text{CaCl}_2$ . Cells were stimulated with thapsigargin (1  $\mu\text{M}$ , EMD Biosciences, San Diego, CA).

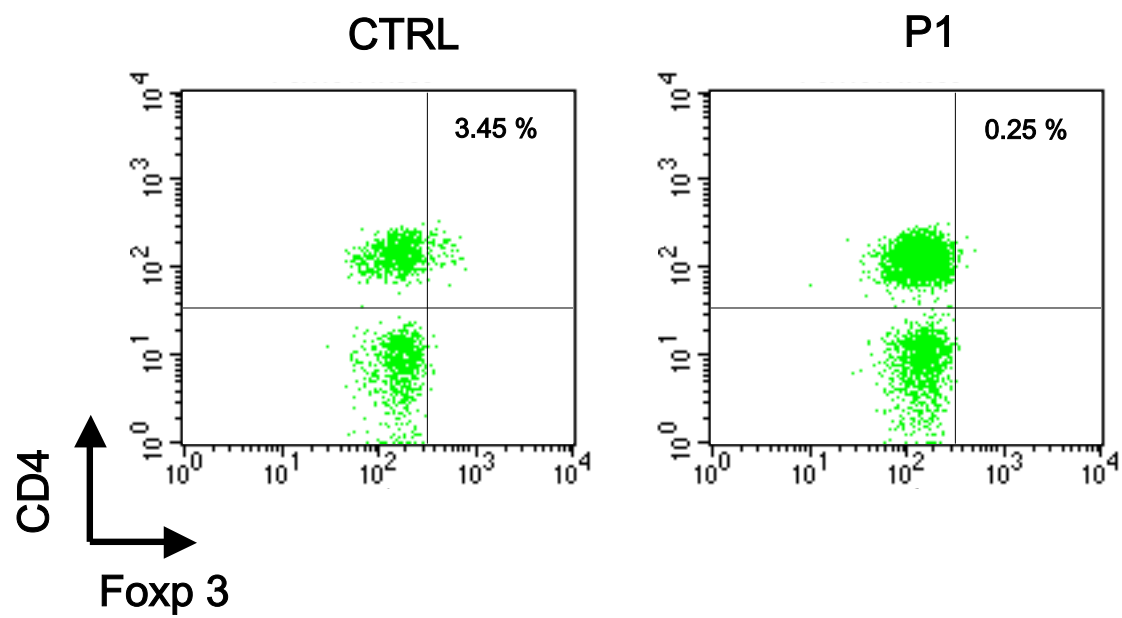

Supplementary Figure 1

**a**

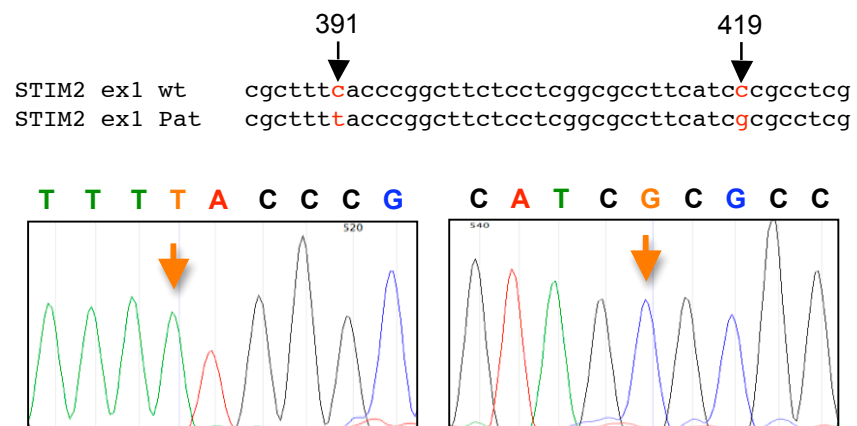

**c**

|             | C/C | C/T | T/T | n  |
|-------------|-----|-----|-----|----|
| <b>C391</b> | 33  | 15  | 0   | 48 |
|             | C/C | C/G | G/G | n  |
| <b>C419</b> | 33  | 15  | 0   | 48 |

**b**

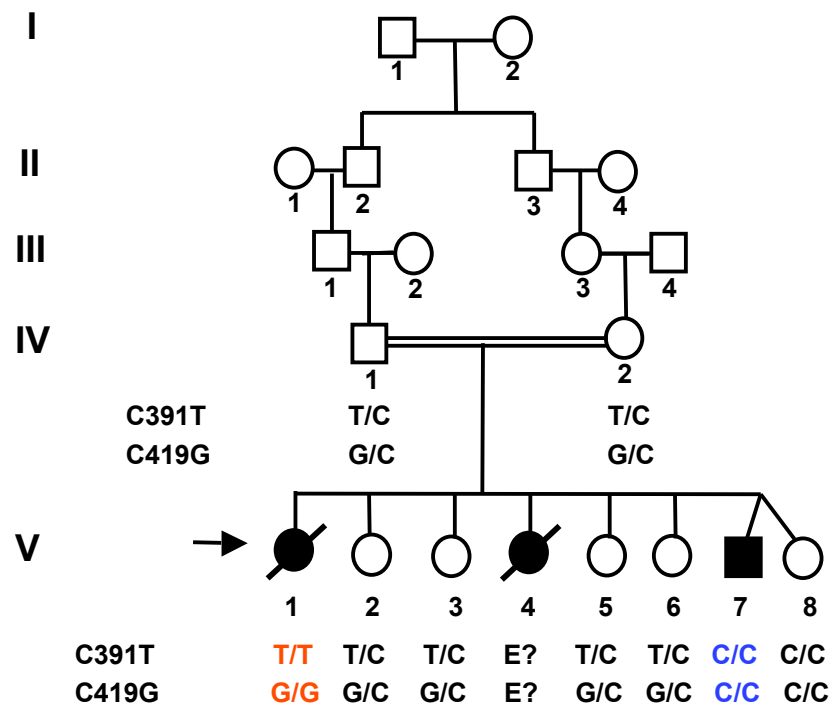

Supplementary Figure 2

**a**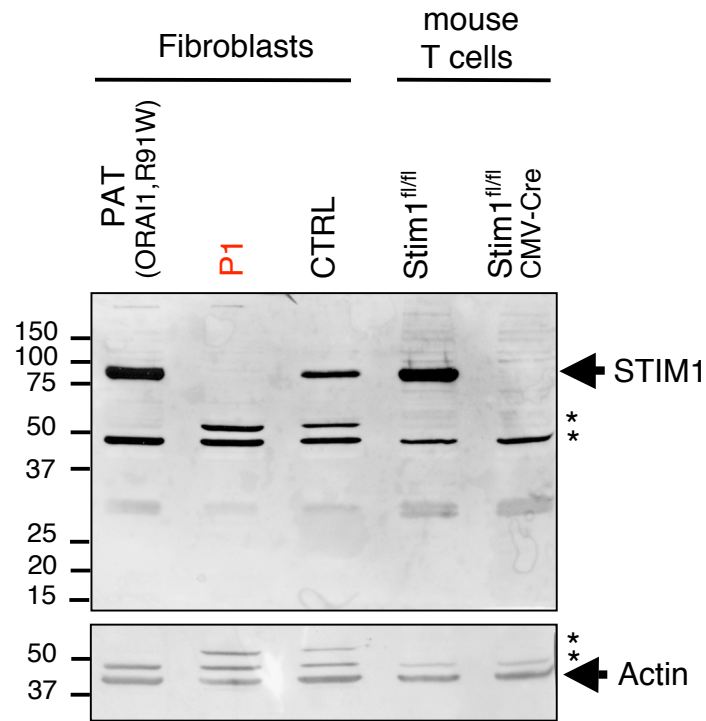**b**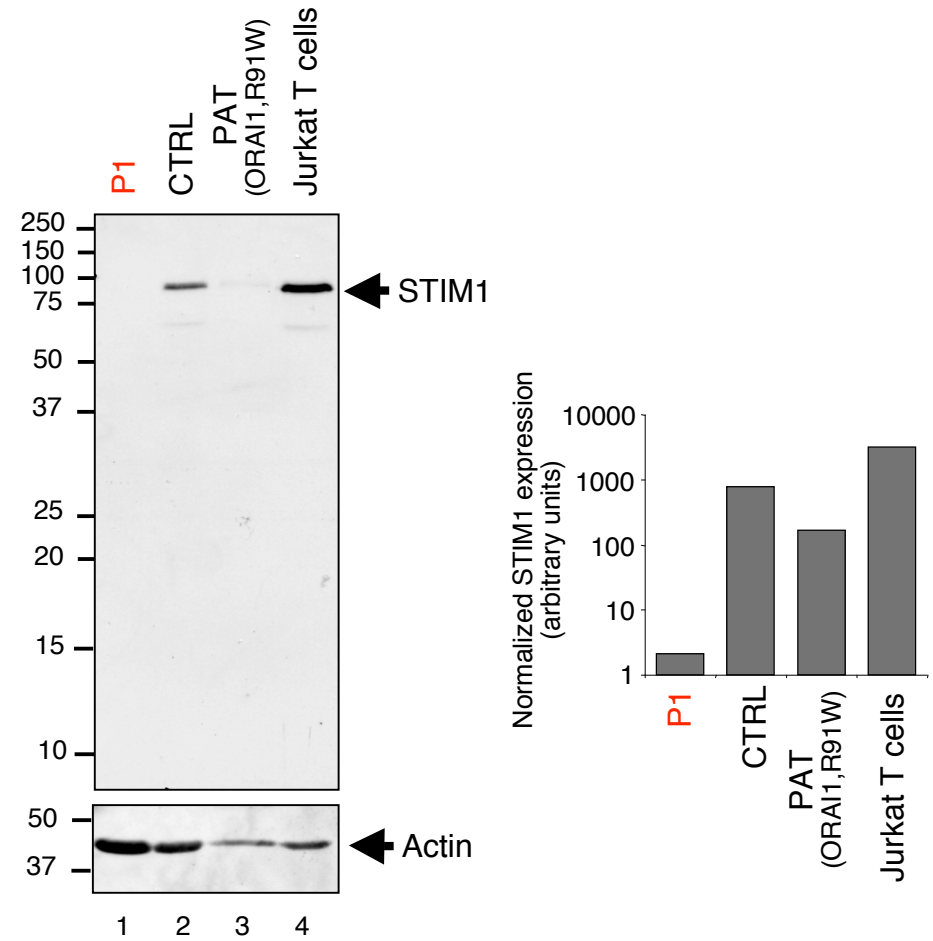

Supplementary Figure 3

|           | 5' Primer sequence |                                | 3' Primer sequence |                               |
|-----------|--------------------|--------------------------------|--------------------|-------------------------------|
| STIM1     |                    |                                |                    |                               |
| Exon 1    | PCR+SEQ            | AAGCTGGGACTTGATCCTTTG          | PCR+SEQ            | CATGTACAAACCTAGATTTCAACTTGC   |
| Exon 2    | PCR+SEQ            | ATGCTAGAAGCTAAGGATGCTG         | PCR+SEQ            | GAAGAGGCTGTCTAAGTAGC          |
| Exon 3    | PCR+SEQ            | GAATGTGTTATGGCTAGCTAGAG        | PCR+SEQ            | ATGTTCTTCTAAGGCCAAGTTGC       |
| Exon 4    | PCR+SEQ            | ATGTGGTAAATATTAAGGTCAGCATGAC   | PCR+SEQ            | TTAACTGGCCAGAGCAATCTG         |
| Exon 5    | PCR+SEQ            | CAATCACCAAGAGCTAGAAGTG         | PCR+SEQ            | TGGAAATAGTATAGGTGCTATCTTGC    |
| Exon 6    | PCR+SEQ            | TCTGTTATGGAAGGCTTCATAGAG       | PCR+SEQ            | AGTTTTGGAAGGATGATGCAGC        |
| Exon 7    | PCR+SEQ            | AGCTGTCATTTTCTCTTTGATGC        | PCR+SEQ            | TGACTCTAGAACATAGTCTTTGGATC    |
| Exon 8    | PCR+SEQ            | AAAGCAGATAAGAAGTCTGAGTTCTG     | PCR+SEQ            | ACCACCAGGATATCTCTTCAC         |
| Exon 9/10 | PCR+SEQ            | GCCTTTCTCATTTATTCCATTCTCG      | PCR+SEQ            | CATCTGCTGTTTAAGCACAACAG       |
| Exon 11   | PCR+SEQ            | ATTCTCCAGATTGGCATTAGAGG        | PCR+SEQ            | CTTCAGAACTGAAAGACTGTCC        |
| Exon 12   | PCR+SEQ            | TCCTTGCTTTCTCGTGTGTC           | PCR+SEQ            | AACAGCAACTAAGACATGCACTG       |
| STIM2     |                    |                                |                    |                               |
| Exon 1    | PCR                | F2: AAGACGCCGTACCTTTCTACC      | PCR                | R1: TGAAAAGGAAAGACGTCCGG      |
|           | SEQ                | F4: TAACCGGAACCAATGAACGC       | SEQ                | R4: AGATGCTGACCTCTGCACG       |
| Exon 2    | PCR+SEQ            | ACATAACTCCTGGTTGTAGTTGC        | PCR+SEQ            | GTTGAAGATGAAGGCAATGAGC        |
| Exon 3    | PCR+SEQ            | GGTGGCGTTACGATTAGTAGC          | PCR+SEQ            | AACTTTAGGCTCTCAGACATGC        |
| Exon 4    | PCR+SEQ            | GGCTTTCTTCTTCTCATAGAGTGC       | PCR+SEQ            | GATTGGCCAAAAGTTGACCC          |
| Exon 5    | PCR+SEQ            | CTAAGTTTGCACTGAAGAGG           | PCR+SEQ            | CTGTTAGGCTCTATTGCTTCATGC      |
| Exon 6    | PCR+SEQ            | GAATTTTAAAAGGCTAGAGCTTGTGC     | PCR+SEQ            | GGTTCAAATGACAGGGAAAGC         |
| Exon 7    | PCR+SEQ            | GCTTTCCTGTCAATTTGAACC          | PCR+SEQ            | AAGACAGTGAAGATGGCAAGG         |
| Exon 8    | PCR+SEQ            | AAGATGCACTTGAAGCTCAGC          | PCR+SEQ            | ACCTGAATCAGATATGAAGCAGC       |
| Exon 9    | PCR+SEQ            | TTGGAATGCAGGGATATCTTGG         | PCR+SEQ            | CAATACATGAACAGACACTGGC        |
| Exon 10   | PCR+SEQ            | CATGTATTGCCTTTTTTCAAGTGCC      | PCR+SEQ            | AACCCAATTTTTTCTCACAGATTTCG    |
| Exon 11   | PCR+SEQ            | TCAGTAAAGGGAGATGAAACAGTG       | PCR+SEQ            | GTCTGTGGTACCTTGATATGTAGC      |
| Exon 12   | PCR+ SEQ           | F1: CAGCATTGAGTTTTGAGAAGCC     | PCR+ SEQ           | R1: GCCCAATGGAGTTACATTCC      |
|           | PCR+ SEQ           | F2: GTGAACTGGCTGACTTGATGG      | PCR+ SEQ           | R2: ATGCAGTTCAAGAAGCTTCCC     |
|           | PCR+ SEQ           | F3: GAAAACCCGCGCTTTTATTATGG    | PCR+ SEQ           | R3: TGTTCAATCCAAACATCCATCTGC  |
|           | PCR+ SEQ           | F4: CATAAGTGATTTGGTTACTGCAATGC | PCR+ SEQ           | R4: GGATAGTAGTATTTGACCTGCTTGC |

Supplementary Table 1
